# Supplementary material for: Mycobacterium tuberculosis transmission in Birmingham, UK, 2009–19: An observational study
Source: PubMed Central journal article supplement (PMC8956939; doi:10.1016/j.lanepe.2022.100361), 2022-03-24

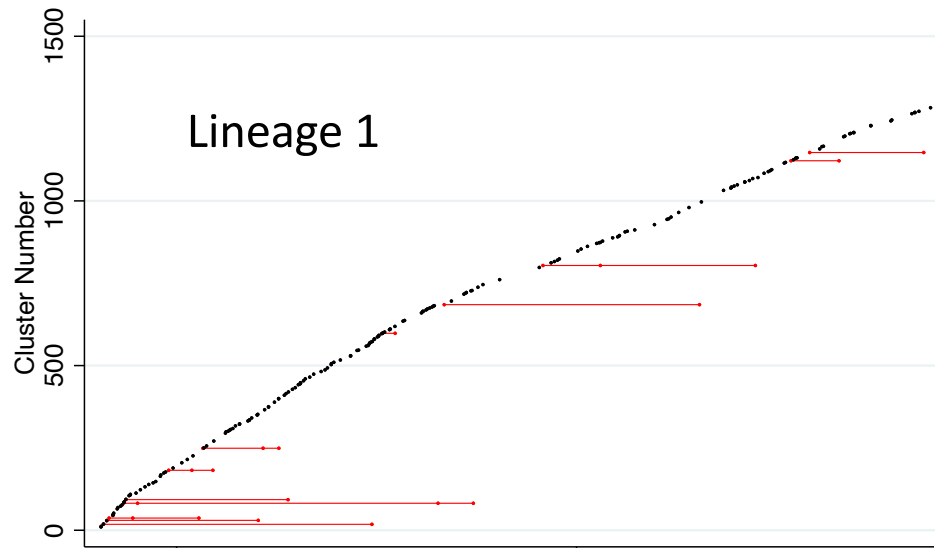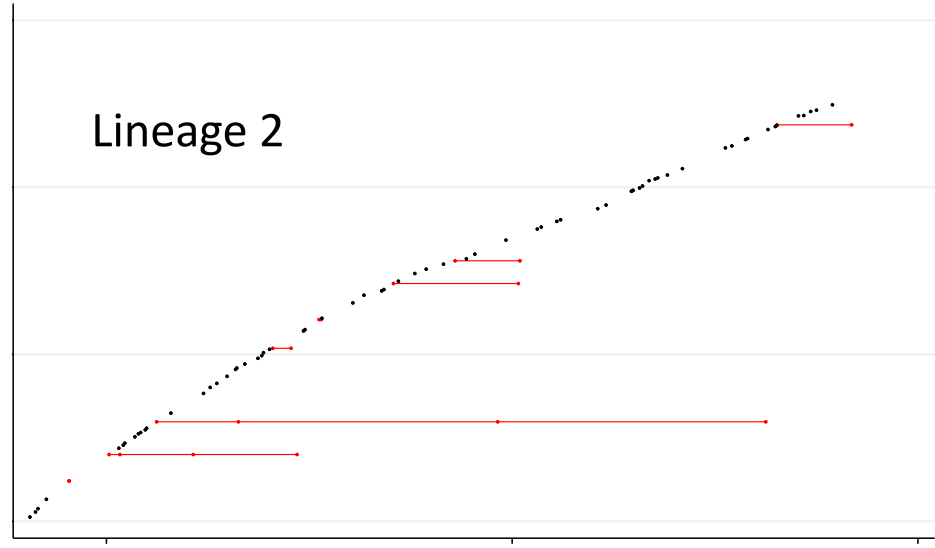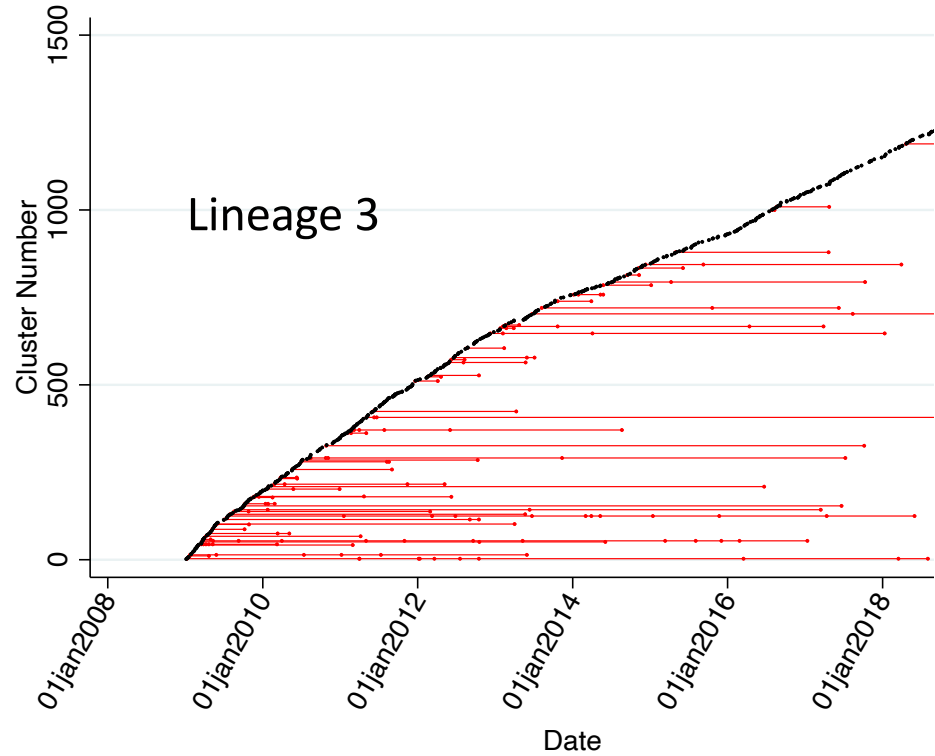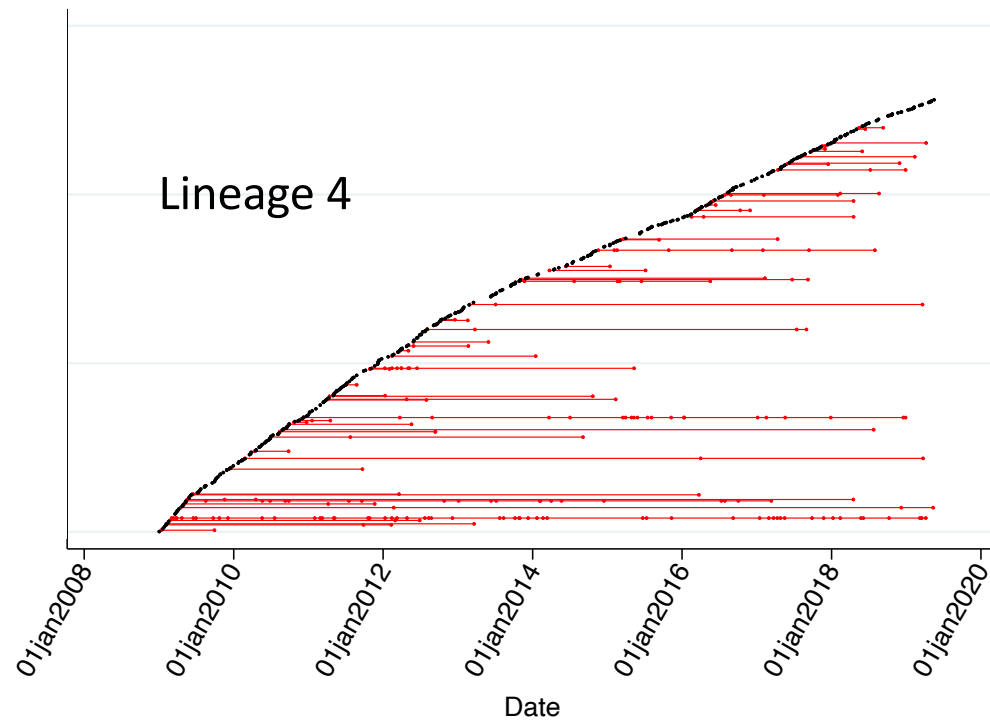

Supplement: mmc4.pdf [file mmc4.pdf]
